# Supplementary figures and images for: TIPE2 deletion improves the therapeutic potential of adoptively transferred NK cells
Source: HighWire-hosted journal article supplement (doi:10.1136/jitc-2022-006002), 2023-02-01

# Supplemental Figure S1

**A**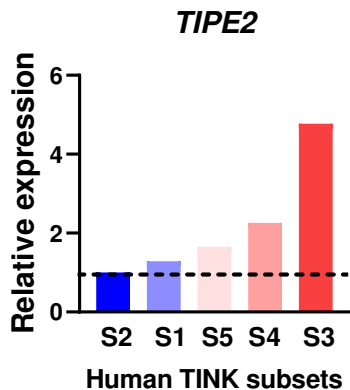**B**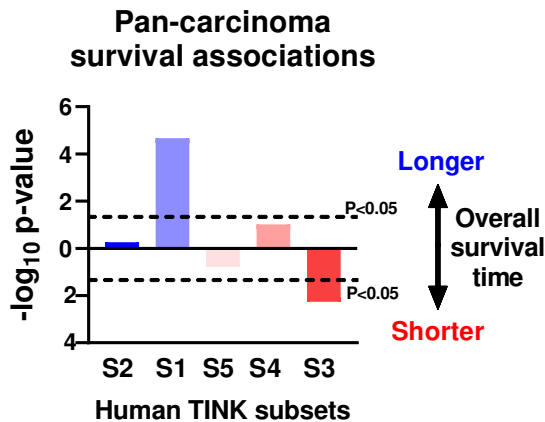

Supplement: jitc-2022-006002supp001_data_supplement.pdf [file jitc-2022-006002supp001_data_supplement.pdf]

# Supplemental Figure S3

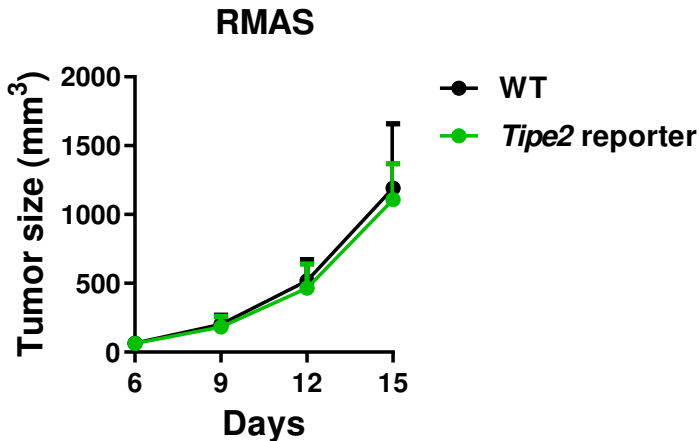

Supplement: jitc-2022-006002supp003_data_supplement.pdf [file jitc-2022-006002supp003_data_supplement.pdf]

## Supplemental Figure S4

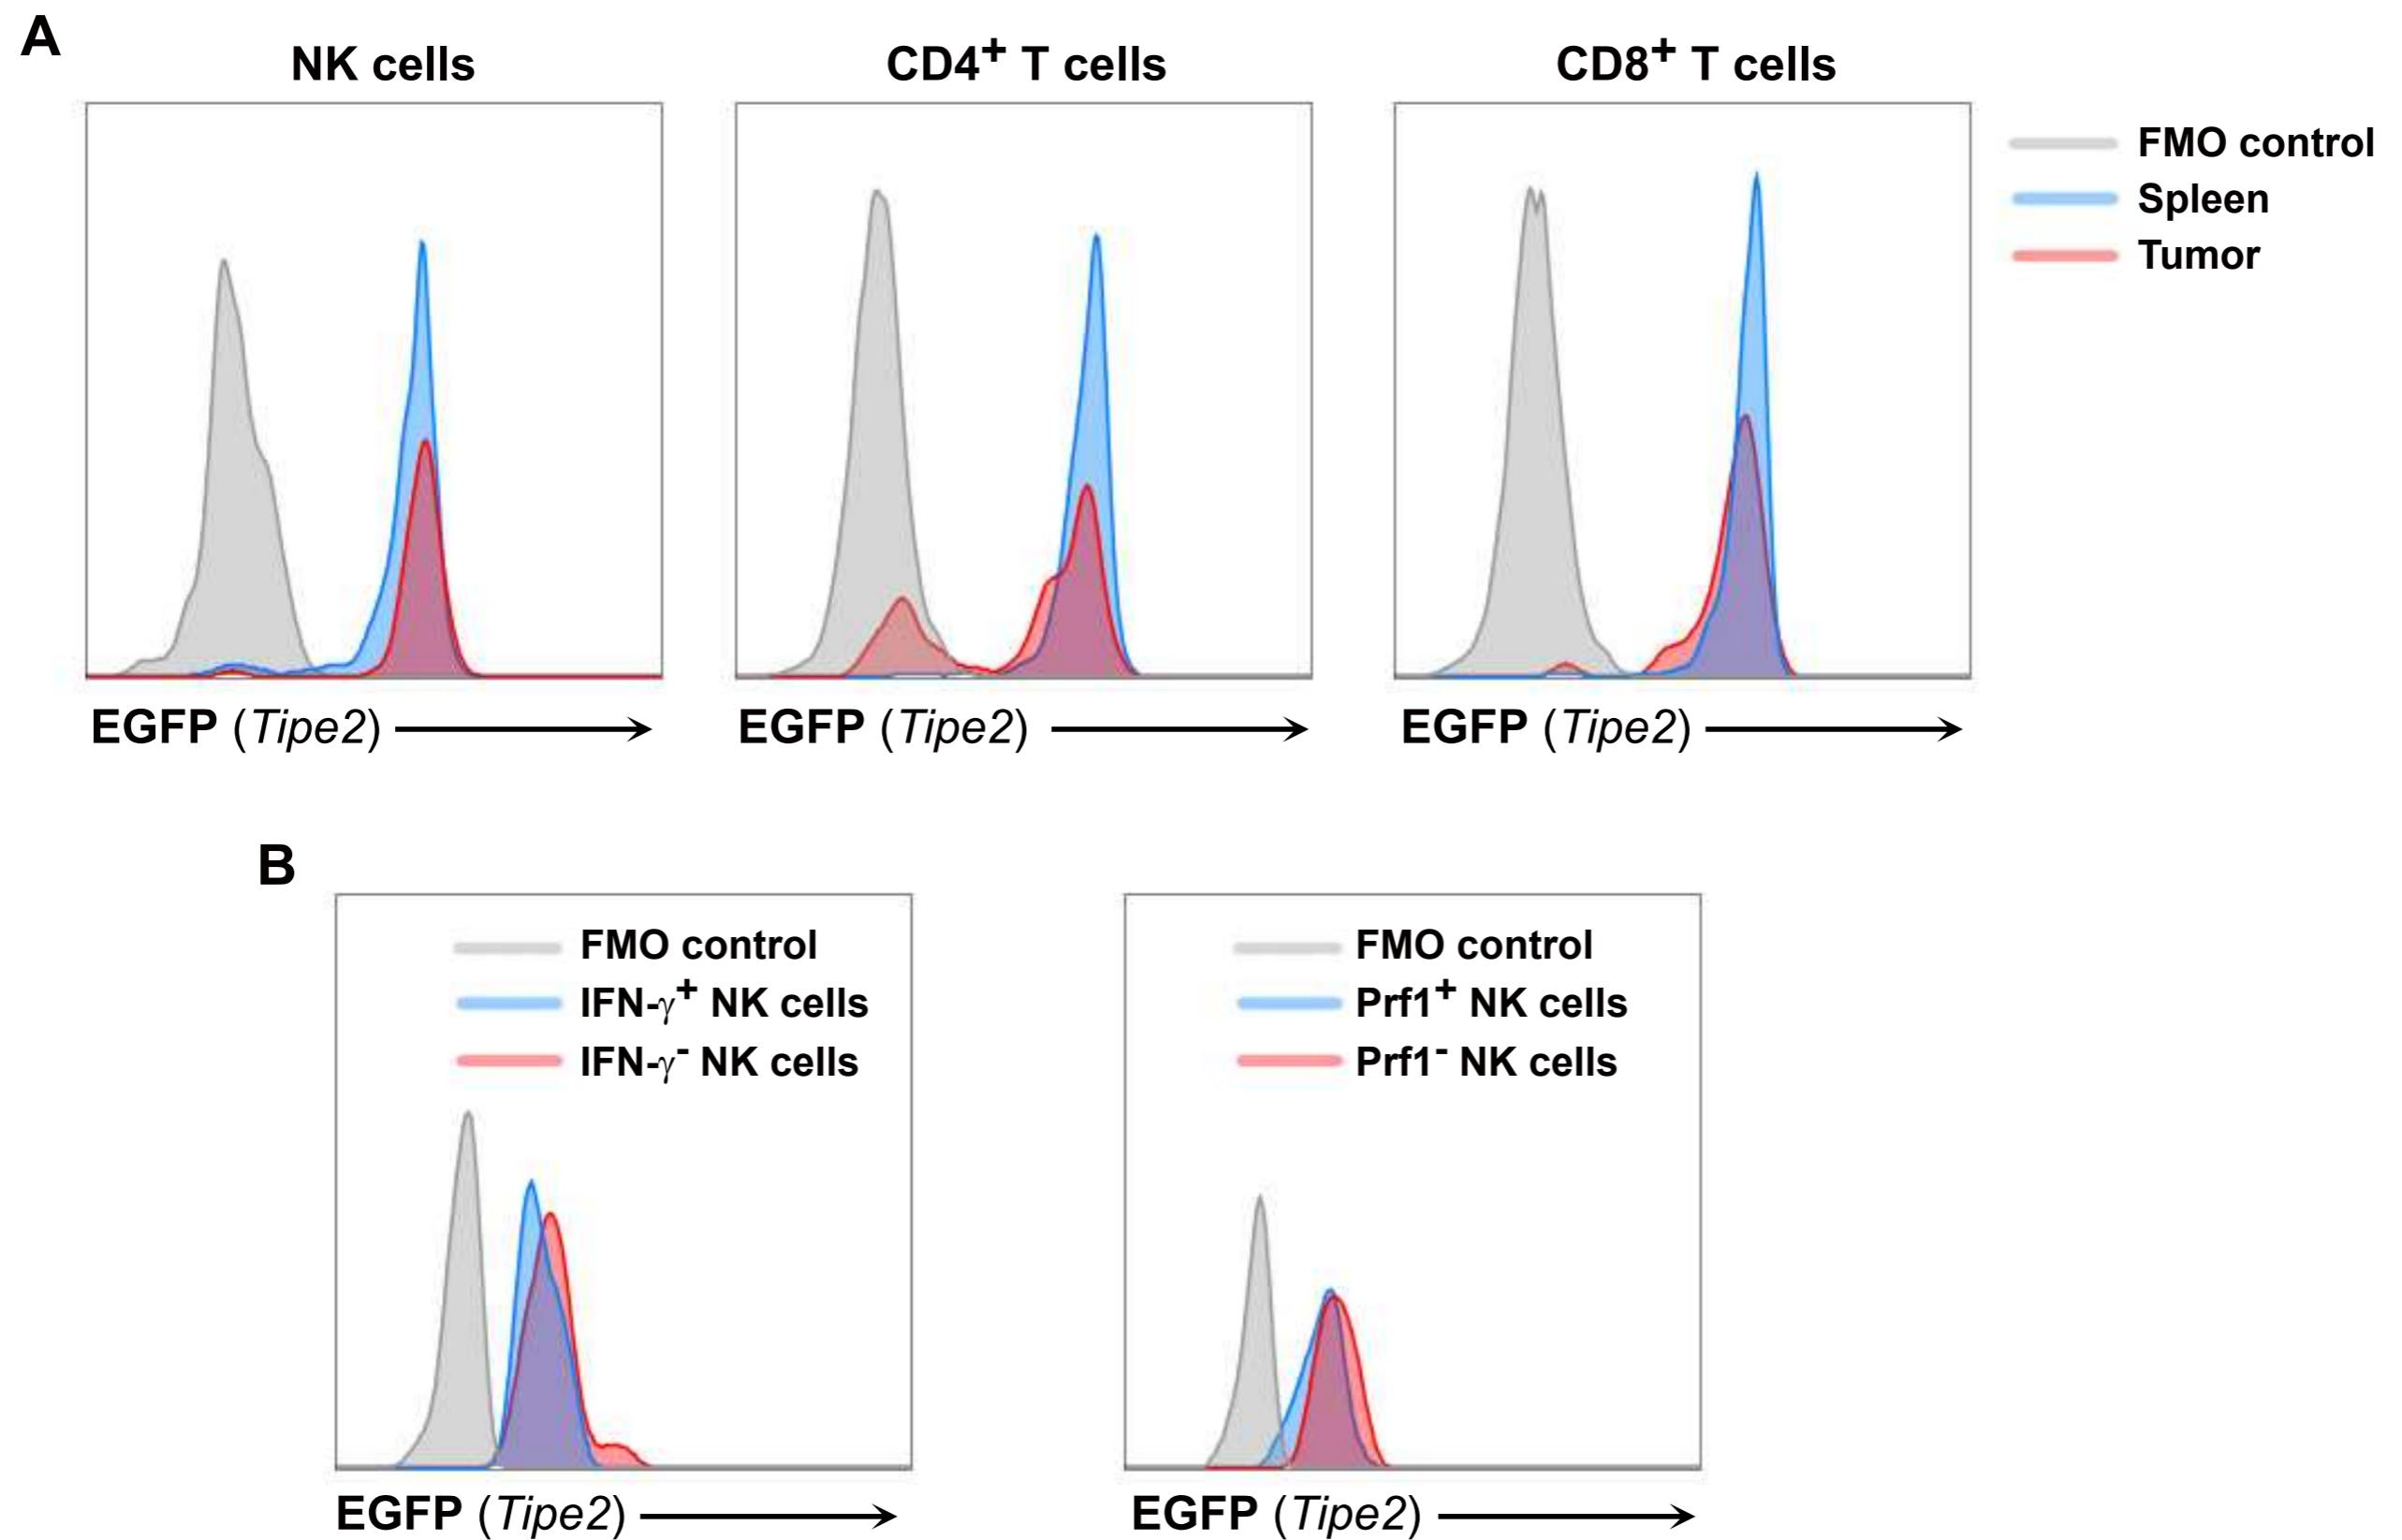

Supplement: jitc-2022-006002supp004_data_supplement.pdf [file jitc-2022-006002supp004_data_supplement.pdf]

# Supplemental Figure S6

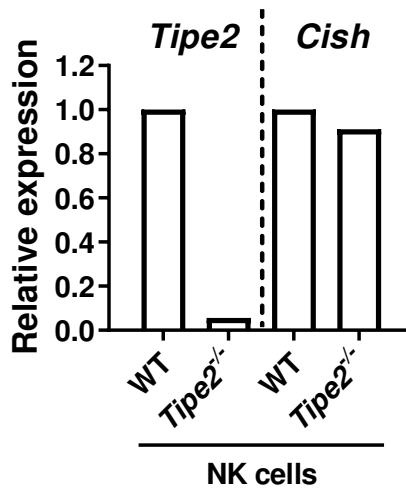

Supplement: jitc-2022-006002supp006_data_supplement.pdf [file jitc-2022-006002supp006_data_supplement.pdf]
